# Supplementary material for: Triple oxygen isotope evidence for the pathway of nitrous oxide production in a forested soil with increased emission on rainy days
Source: Copernicus journal article supplement (doi:10.5194/bg-22-4333-2025), 2025-09-01
Supplement: Supplementary file 1 [file bg-22-4333-2025-supplement.pdf]

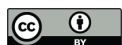

*Supplement of*

**Triple oxygen isotope evidence for the pathway of nitrous oxide production in a forested soil with increased emission on rainy days**

**Weitian Ding et al.**

*Correspondence to:* Weitian Ding ([dingweitian@ncu.edu.cn](mailto:dingweitian@ncu.edu.cn))

The copyright of individual parts of the supplement might differ from the article licence.

## **Text S1. Calculation of WFPS**

WFPS was calculated using Eq. S1 (Liu et al., 2007):

$$\text{WFPS (\%)} = (\Theta_v/P)*100 \quad (\text{S1})$$

where  $\Theta_v$  denotes the volumetric water content (%) and  $P$  represents the total soil porosity.

The volumetric water content ( $\Theta_v$ ) was calculated using Eq. S2:

$$\Theta_v (\%) = \Theta_g * B_d \quad (\text{S2})$$

where  $\Theta_g$  denotes the gravimetric water content (%) and  $B_d$  denotes the bulk density ( $\text{g/cm}^3$ ).  $B_d$  ( $1.12 \pm 0.1 \text{ g/cm}^3$  on average;  $n = 3$ ) was estimated by dividing the dry weight of each soil sample by the volume of the forested soil. The average value of  $B_d$  estimated in this study corresponds well with those determined in forested soils (Han et al., 2016; Jalabert et al., 2010; Teepe et al., 2003).

The gravimetric soil water content ( $\Theta_g$ ) was calculated using Eq. S3:

$$\Theta_g (\%) = (M_{\text{soil}} - M_{\text{dry}}) / M_{\text{dry}}, \quad (\text{S3})$$

where  $M_{\text{soil}}$  denotes the initial weight of the sampled soil and  $M_{\text{dry}}$  denotes the final weight of the soil that had been dried for 48 h in an oven at 80 °C.

Total soil porosity ( $P$ ) was calculated using Eq. S4:

$$P (\%) = (1 - (B_d/P_d))*100 \quad (\text{S4})$$

where  $P_d$  denotes the soil density. In this study, we used a regular soil density of  $2.65 \text{ g/cm}^3$  for  $P_d$  (Blake, 2008).

## **Text S2. Comparative experiment for the extraction of soil $\text{NO}_2^-$**

While the 2M KCl extraction is widely used for soil nitrite ( $\text{NO}_2^-$ ) analysis (e.g., Lewicka-Szczebak et al., 2021; Shen et al., 2003), Homyak et al. (2015) raised the concerns

that the recovery of soil  $\text{NO}_2^-$  could be low when using KCl solutions compared to deionized water.

To evaluate this potential issue, we conducted a comparative experiment in April 2022 prior to this study. We collected a soil sample from our study site, which was thoroughly homogenized and divided into two 50 g subsamples. Each subsample was then extracted with either 50 mL of 2M KCl solution or 50 mL MQ water, following the same analytical procedures used in this study.

Our results showed consistent values between the two extraction methods: the KCl-extracted sample yielded a  $\text{NO}_2^-$  concentration of  $0.90 \mu\text{M}$  with  $\Delta^{17}\text{O}$  of  $0.55 \pm 0.1\text{‰}$ , while the MQ water-extracted sample showed a  $\text{NO}_2^-$  concentration of  $0.98 \mu\text{M}$  with  $\Delta^{17}\text{O}$  of  $0.62 \pm 0.1\text{‰}$ . Because both the concentration and  $\Delta^{17}\text{O}$  value of soil  $\text{NO}_2^-$  in KCl solution and MQ water showed no significant differences, we concluded that for our soil type and experimental conditions, the use of 2M KCl solution introduced negligible bias in terms of  $\text{NO}_2^-$  recovery or  $\Delta^{17}\text{O}$  measurements compared to MQ water extraction.

### **Text S3. Approximating $1/[\text{N}_2\text{O}]$ as 0**

During the nitrification reaction, only  $\text{N}_2\text{O}$  is the gaseous component. However, because of the further reduction of  $\text{N}_2\text{O}$  to  $\text{N}_2$  during denitrification in soils, the emission of  $\text{N}_2\text{O}$  from soil was typically accompanied by  $\text{N}_2$  emission (Figure 1). Consequently, the concentration of  $\text{N}_2\text{O}$  ( $[\text{N}_2\text{O}]$ ) in the gas emitted from the soil could be diluted by  $\text{N}_2$  to some extent; thus,  $[\text{N}_2\text{O}]$  emitted from the soil could be less than 100 %. If  $[\text{N}_2\text{O}]$  emitted from the soil was smaller than 100 %, the  $\Delta^{17}\text{O}$  value of  $\text{N}_2\text{O}$  emitted from the soil (“true”  $\Delta^{17}\text{O}$  value) should deviate from that determined using the linear correlation between

62  $1/[N_2O]$  and the  $\Delta^{17}O$ , assuming that the  $1/[N_2O]$  was 0 in the gas emitted from the soil  
63 (Figures 3, 5, and S5). However, the  $N_2O/(N_2O + N_2)$  ratios of soil gas were always higher  
64 than 3% (Domeignoz-Horta et al., 2015; Scheer et al., 2020; Wang et al., 2020), which  
65 corresponds to  $1/[N_2O]$  being less than  $3.3 \cdot 10^{-8} \text{ ppb}^{-1}$  for  $N_2O$  emitted from the soil.  
66 Because almost all slopes found in the linear correlation between  $1/[N_2O]$  and  $\Delta^{17}O$  showed  
67 were less than 2600 ‰ per  $\text{ppb}^{-1}$  (Figures 3, 5, and S5), the deviations in the  $\Delta^{17}O$  values  
68 from the “true” value of each were always less than 0.0001 ‰. Consequently, we ignored  
69 the deviation and used a  $1/[N_2O]$  value of 0 for  $N_2O$  emitted from the soil.  
70

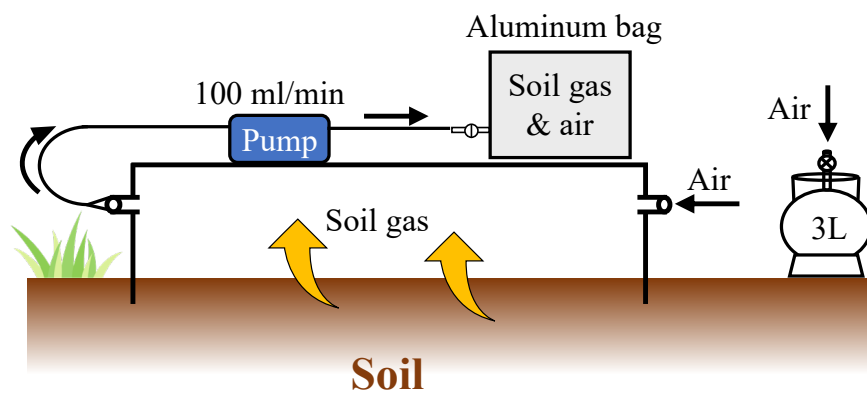

71 **Figure S1.** Schematic showing the flow chamber system used for sampling gases emitted  
 72 from soil.

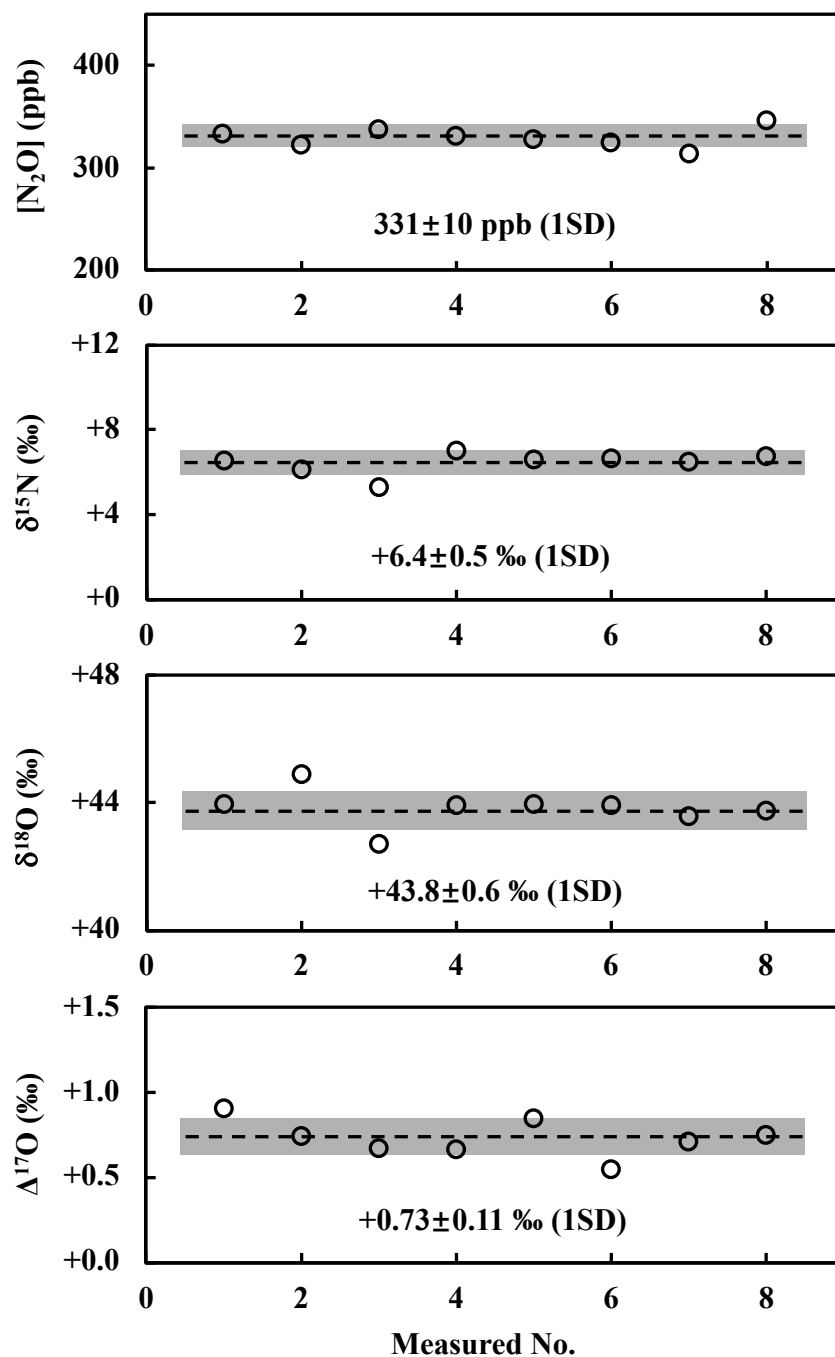

73 **Figure S2.** Results of repeated measurements of  $\text{N}_2\text{O}$  in an atmospheric sample collected  
 74 at Nagoya University.

75

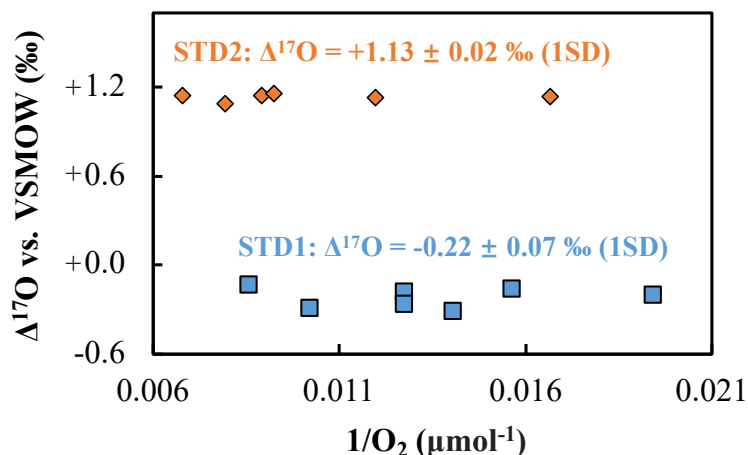

76 **Figure S3.**  $\Delta^{17}\text{O}$  values of  $\text{N}_2\text{O}$  in the standards (STD1 and STD2) determined on the  
 77 VSMOW scale plotted as a function of the reciprocal of the  $\text{O}_2$  quantities evolved through  
 78 offline reactions with  $\text{NiO}$  and  $\text{BrF}_5$ .  
 79

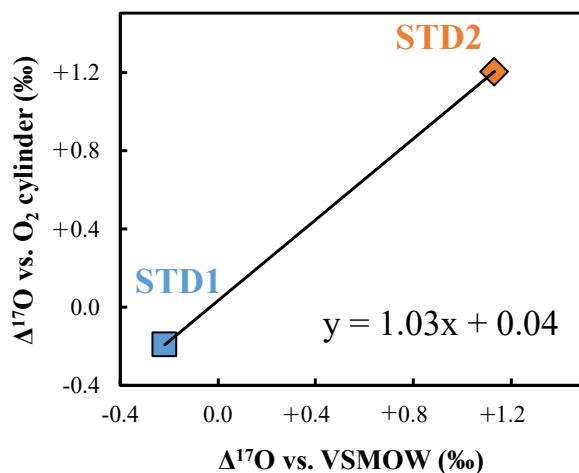

80 **Figure S4.** Relationship between the  $\Delta^{17}\text{O}$  values of the  $\text{N}_2\text{O}$  standards determined using  
 81 the CF-IRMS system and those of the same  $\text{N}_2\text{O}$  standards determined using the offline  
 82 method. During the measurements using the CF-IRMS system, pure  $\text{O}_2$  in a cylinder with  
 83  $\Delta^{17}\text{O}$  values calibrated to the VSMOW scale was used as the reference gas.

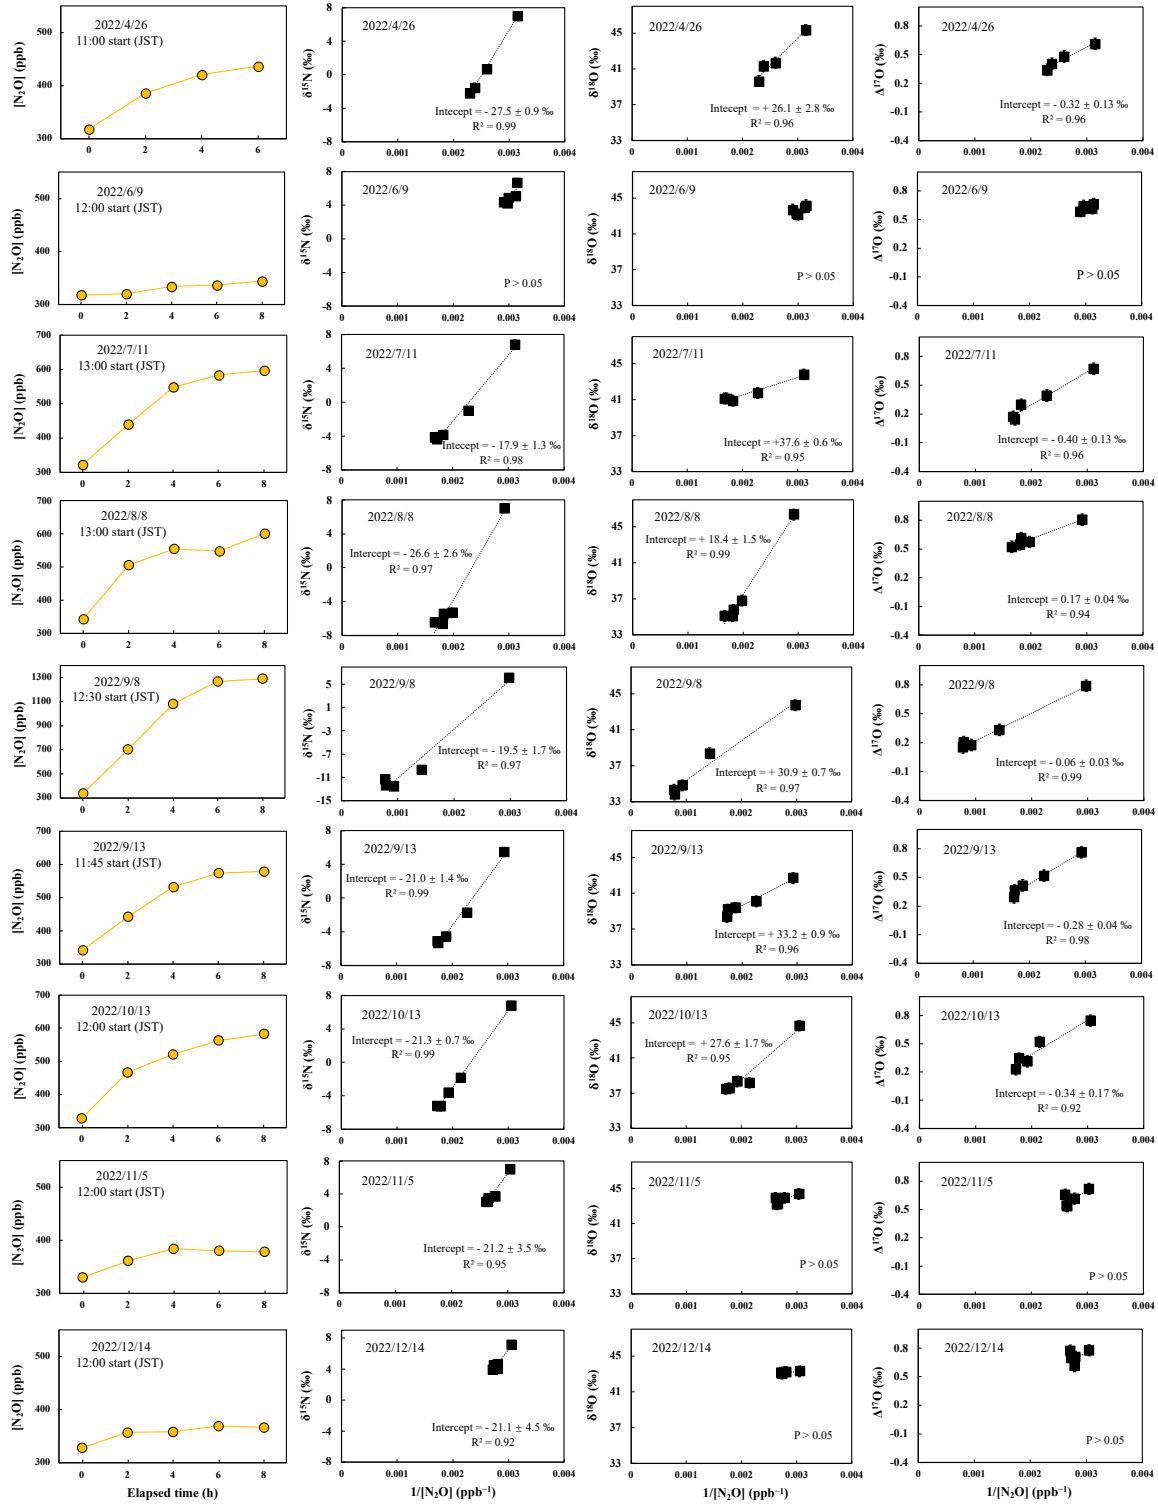

84 **Figure S5.** Changes in  $[N_2O]$  of the gas samples collected from the forested soil plotted as  
85 a function of the elapsed time since the deployment of the flow chamber, and the  $\delta^{15}N$ ,  
86  $\delta^{18}O$ , and  $\Delta^{17}O$  values of  $N_2O$  plotted as a function of the reciprocal of  $[N_2O]$  ( $1/[N_2O]$ ).



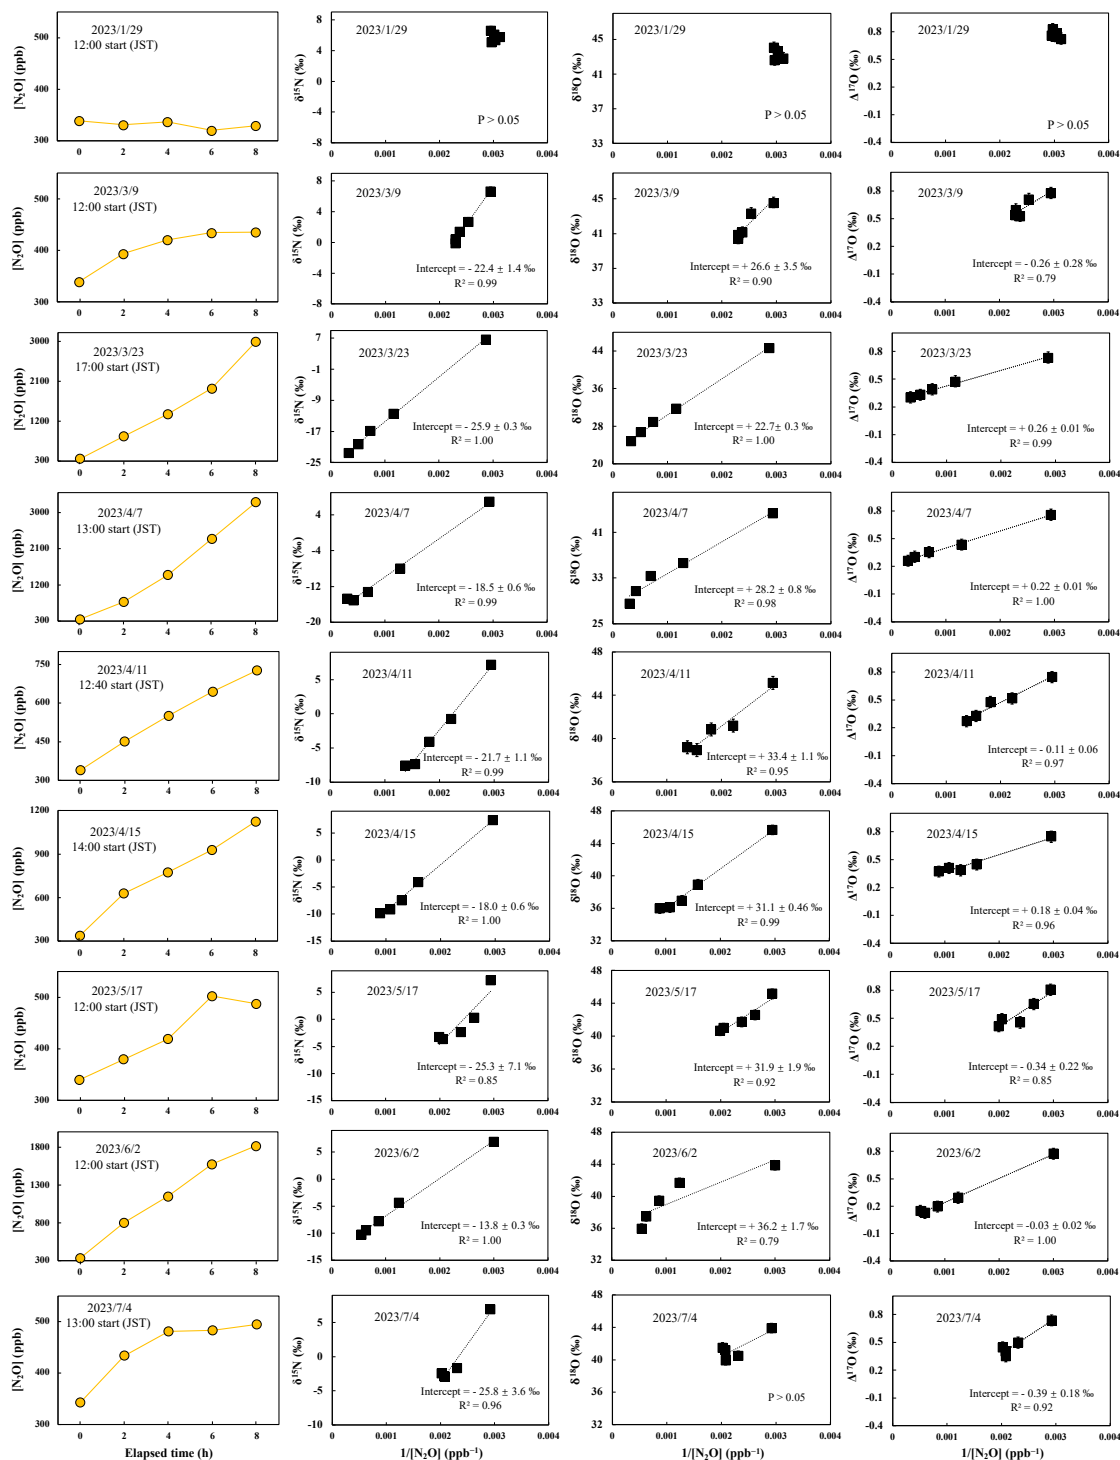

87 **Figure S5. (continued).** Changes in  $[N_2O]$  of the gas samples collected from the forested  
88 soil plotted as a function of the elapsed time since the deployment of the flow chamber,  
89 and the  $\delta^{15}N$ ,  $\delta^{18}O$ , and  $\Delta^{17}O$  values of  $N_2O$  plotted as a function of the reciprocal of  $[N_2O]$   
90 ( $1/[N_2O]$ ).

91 **Table S1.** Data obtained in this study.

| Soil type       | Time         | T <sup>#</sup> | Wind speed | P <sup>#</sup> | WFPS <sup>#</sup> | [NH <sub>4</sub> <sup>+</sup> ] | [NO <sub>3</sub> <sup>-</sup> ] | [NO <sub>2</sub> <sup>-</sup> ] | Flux-N <sub>2</sub> O                | δ <sup>18</sup> O (NO <sub>2</sub> <sup>-</sup> ) | Δ <sup>17</sup> O (NO <sub>2</sub> <sup>-</sup> ) | δ <sup>15</sup> N (N <sub>2</sub> O) | δ <sup>18</sup> O (N <sub>2</sub> O) | Δ <sup>17</sup> O (N <sub>2</sub> O) |
|-----------------|--------------|----------------|------------|----------------|-------------------|---------------------------------|---------------------------------|---------------------------------|--------------------------------------|---------------------------------------------------|---------------------------------------------------|--------------------------------------|--------------------------------------|--------------------------------------|
|                 |              | °C             | m / s      | mm             | %                 | mg N kg <sup>-1</sup>           |                                 |                                 | μg N m <sup>-2</sup> h <sup>-1</sup> | ‰                                                 |                                                   |                                      |                                      |                                      |
| Natural soil    | 2022/4/26    | 22.3           | 5.3        | 0              | 71.6              | 11.5                            | 1.2                             | 0.03                            | 3.6                                  | 12.03                                             | 0.50                                              | -27.5                                | 26.1                                 | -0.32                                |
|                 | 2022/6/9     | 25.2           | 4.8        | 0              | 60.5              | 7.6                             | 0.9                             | 0.01                            | 0.6                                  | 6.72                                              | 0.04                                              | -                                    | -                                    | -                                    |
|                 | 2022/7/11    | 30.5           | 3.7        | 0              | 77.4              | 10.1                            | 0.4                             | 0.16                            | 6.9                                  | 5.19                                              | 0.25                                              | -17.9                                | 37.6                                 | -0.40                                |
|                 | 2022/8/8     | 30.2           | 3.6        | 17.5           | 61.1              | 8.9                             | 0.4                             | 0.17                            | 6.9                                  | 6.98                                              | 0.29                                              | -26.6                                | 18.4                                 | 0.17                                 |
|                 | 2022/9/8     | 26.6           | 2.1        | 11.5           | 92.3              | 9.5                             | 0.5                             | 0.09                            | 23.7                                 | 7.37                                              | 0.06                                              | -19.5                                | 30.9                                 | -0.06                                |
|                 | 2022/9/13    | 31.1           | 3.3        | 0              | 69.7              | 12.5                            | 1.6                             | 0.12                            | 6.0                                  | 2.42                                              | 0.13                                              | -21                                  | 33.2                                 | -0.28                                |
|                 | 2022/10/13   | 20.3           | 1.5        | 0              | 60.9              | 16.9                            | 1.6                             | 0.21                            | 6.5                                  | 3.10                                              | 0.09                                              | -21.3                                | 27.6                                 | -0.34                                |
|                 | 2022/11/5    | 17.4           | 3.7        | 0              | 59.6              | 0.7                             | 5.9                             | 0.03                            | 1.1                                  | 4.51                                              | 0.21                                              | -21.2                                | -                                    | -                                    |
|                 | 2022/12/14   | 6.4            | 7.0        | 0              | 63.7              | 9.7                             | 2.2                             | 0.15                            | 0.8                                  | 5.84                                              | 0.11                                              | -21.1                                | -                                    | -0.31                                |
|                 | 2023/1/29    | 5.3            | 3.0        | 0              | 74.3              | 8.5                             | 2.5                             | 0.16                            | -0.2                                 | 6.22                                              | 0.24                                              | -                                    | -                                    | -                                    |
|                 | 2023/3/9     | 18.9           | 4.2        | 0              | 68.7              | 8.6                             | 6.0                             | 0.12                            | 2.4                                  | 5.55                                              | 0.25                                              | -22.4                                | 26.6                                 | -0.26                                |
|                 | 2023/3/23    | 18.4           | 3.9        | 16.5           | 91.5              | 13.0                            | 3.2                             | 0.45                            | 67.3                                 | 5.93                                              | 0.29                                              | -25.9                                | 22.7                                 | 0.26                                 |
|                 | 2023/4/7     | 16.3           | 5.8        | 32.5           | 113.7             | 11.7                            | 1.2                             | 0.16                            | 77.4                                 | 6.91                                              | 0.23                                              | -18.5                                | 28.2                                 | 0.22                                 |
|                 | 2023/4/11    | 19.9           | 5.2        | 0              | 66.2              | 11.6                            | 1.1                             | 0.23                            | 9.8                                  | 6.85                                              | 0.20                                              | -21.7                                | 33.4                                 | -0.11                                |
|                 | 2023/4/15    | 13.7           | 1.9        | 33.5           | 108.4             | 11.7                            | 0.9                             | 0.19                            | 20.0                                 | 4.24                                              | 0.25                                              | -18.0                                | 31.1                                 | 0.18                                 |
|                 | 2023/5/17    | 31.2           | 2.9        | 0              | 61.7              | 10.1                            | 0.7                             | 0.13                            | 3.7                                  | 5.75                                              | 0.40                                              | -25.3                                | 31.9                                 | -0.34                                |
|                 | 2023/6/2     | 21.4           | 2.3        | 137            | 106.7             | 6.2                             | 0.03                            | 0.04                            | 37.4                                 | 5.79                                              | 0.19                                              | -13.8                                | 36.2                                 | -0.03                                |
|                 | 2023/7/4     | 31.1           | 4.4        | 0              | 58.7              | 7.6                             | 0.1                             | 0.15                            | 3.8                                  | 6.25                                              | 0.40                                              | -25.8                                | -                                    | -0.39                                |
| Fertilized soil | 2023/7/18 NF | 34.6           | 4.1        | 0              | 71.9              | 12.4                            | 2.0                             | 0.20                            | 5.2                                  | 2.69                                              | 0.42                                              | -17.1                                | 36.1                                 | -0.37                                |
|                 | 2023/7/22 NF | 30.9           | 4.7        | 0              | 59.4              | 12.0                            | 2.6                             | 0.26                            | 4.2                                  | 1.33                                              | 0.35                                              | -12.2                                | 40                                   | -0.32                                |
|                 | 2023/7/18 U  | 34.6           | 4.1        | 0              | 80.3              | 410.2                           | 5.4                             | 0.10                            | 70.6                                 | 7.64                                              | 0.31                                              | -39.3                                | 34.4                                 | -0.14                                |
|                 | 2023/7/22 U  | 30.9           | 4.7        | 0              | 62.9              | 435.9                           | 20.5                            | 0.07                            | 56.7                                 | 5.40                                              | 0.17                                              | -33.3                                | 25.7                                 | -0.16                                |
|                 | 2023/7/18 CS | 34.6           | 4.1        | 0              | 47.6              | 12.9                            | 247.8                           | 0.09                            | 112.3                                | 28.98                                             | 8.26                                              | -19.3                                | 54.1                                 | 8.22                                 |
|                 | 2023/7/22 CS | 30.9           | 4.7        | 0              | 37.9              | 18.7                            | 309.0                           | 0.07                            | 39.4                                 | 45.24                                             | 12.32                                             | -11.3                                | 58.7                                 | 7.36                                 |

92 T<sup>#</sup>: Air temperature

93 P<sup>#</sup>: Precipitation

94 WFPS<sup>#</sup>: Water-filled pore space

## References

- Blake, G. R.: Particle density, in: Encyclopedia of Soil Science, edited by: Chesworth, W., Springer Netherlands, Dordrecht, 504–505, [https://doi.org/10.1007/978-1-4020-3995-9\\_406](https://doi.org/10.1007/978-1-4020-3995-9_406), 2008.
- Domeignoz-Horta, L., Spor, A., Bru, D., Breuil, marie-christine, Bizouard, F., Leonard, J., and PHILIPPOT, L.: The diversity of the N<sub>2</sub>O reducers matters for the N<sub>2</sub>O:N<sub>2</sub> denitrification end-product ratio across an annual and a perennial cropping system, *Frontiers in Microbiology*, 6, 2015.
- Han, Y., Zhang, J., Mattson, K. G., Zhang, W., and Weber, T. A.: Sample Sizes to Control Error Estimates in Determining Soil Bulk Density in California Forest Soils, *Soil Science Society of America Journal*, 80, 756–764, <https://doi.org/10.2136/sssaj2015.12.0422>, 2016.
- Homyak, P. M., Vasquez, K. T., Sickman, J. O., Parker, D. R., and Schimel, J. P.: Improving Nitrite Analysis in Soils: Drawbacks of the Conventional 2 M KCl Extraction, *Soil Science Society of America Journal*, 79, 1237–1242, <https://doi.org/10.2136/sssaj2015.02.0061n>, 2015.
- Jalabert, S. S. M., Martin, M. P., Renaud, J.-P., Boulonne, L., Jolivet, C., Montanarella, L., and Arrouays, D.: Estimating forest soil bulk density using boosted regression modelling, *Soil Use and Management*, 26, 516–528, <https://doi.org/10.1111/j.1475-2743.2010.00305.x>, 2010.
- Lewicka-Szczebak, D., Jansen-Willems, A., Müller, C., Dyckmans, J., and Well, R.: Nitrite isotope characteristics and associated soil N transformations, *Sci Rep*, 11, 5008, <https://doi.org/10.1038/s41598-021-83786-w>, 2021.
- Liu, X. J., Mosier, A. R., Halvorson, A. D., Reule, C. A., and Zhang, F. S.: Dinitrogen and N<sub>2</sub>O emissions in arable soils: Effect of tillage, N source and soil moisture, *Soil Biology and Biochemistry*, 39, 2362–2370, <https://doi.org/10.1016/j.soilbio.2007.04.008>, 2007.
- Scheer, C., Fuchs, K., Pelster, D. E., and Butterbach-Bahl, K.: Estimating global terrestrial denitrification from measured N<sub>2</sub>O:(N<sub>2</sub>O + N<sub>2</sub>) product ratios, *Current Opinion in Environmental Sustainability*, 47, 72–80, <https://doi.org/10.1016/j.cosust.2020.07.005>, 2020.
- Shen, Q. R., Ran, W., and Cao, Z. H.: Mechanisms of nitrite accumulation occurring in soil nitrification, *Chemosphere*, 50, 747–753, [https://doi.org/10.1016/S0045-6535\(02\)00215-1](https://doi.org/10.1016/S0045-6535(02)00215-1), 2003.
- Teepe, R., Dilling, H., and Beese, F.: Estimating water retention curves of forest soils from soil texture and bulk density, *Journal of Plant Nutrition and Soil Science*, 166, 111–119, <https://doi.org/10.1002/jpln.200390001>, 2003.
- Wang, R., Pan, Z., Zheng, X., Ju, X., Yao, Z., Butterbach-Bahl, K., Zhang, C., Wei, H., and Huang, B.: Using field-measured soil N<sub>2</sub>O fluxes and laboratory scale parameterization

of  $\text{N}_2\text{O}/(\text{N}_2\text{O}+\text{N}_2)$  ratios to quantify field-scale soil  $\text{N}_2$  emissions, *Soil Biology and Biochemistry*, 148, 107904, <https://doi.org/10.1016/j.soilbio.2020.107904>, 2020.
